# Supplementary material for: Marker-Assisted Selection for Early Maturing E Loci in Soybean Yielded Prospective Breeding Lines for High Latitudes of Northern Kazakhstan
Source: MDPI journal article supplement (doi:10.3390/biom13071146), 2023-07-18
Supplement: s1 [file s1]

## Supplementary Materials to the paper

Yerzhebayeva, R.; Didorenko, S.; Amangeldiyeva, A.; Daniyarova, A.; Mazkirat, S.; Zinchenko, A.; Shavrukov, Y. Marker-Assisted Selection for Early Maturing *E* Loci in Soybean Yielded Prospective Breeding Lines for High Latitudes of Northern Kazakhstan. *Biomolecules* **2023**.

**Supplementary Material S1.** Sequences of primers for the used molecular markers and PCR conditions for allele identification in four *E* genes controlling sensitivity to photoperiod in soybean plants.

| Gene      | Molecular markers |                                                                                  |                                                                                          |
|-----------|-------------------|----------------------------------------------------------------------------------|------------------------------------------------------------------------------------------|
|           | Name              | Primer nucleotide sequences                                                      | PCR conditions                                                                           |
| <i>E1</i> | Satt557           | F: GCGGGATCCACCATGTAATATGTG<br>R: GCGCACTAACCCTTTATTGAA                          | 95 C – 5 min; 35 cycles (92 C – 30 sec, 58°C – 30 sec, 72°C – 45 sec); 72°C – 7 min      |
|           | Satt365           | F: TGCTCCCCTCTGCCTTTTTTTTCTATTTT<br>R: AAGGATGAGTTTGATAAACATGAATGAAGAA           |                                                                                          |
| <i>E3</i> | Satt 229          | F: TGGCAGCACACCTGCTAAGGGAATAAA<br>R: GCGAGGTGGTCTAAAATTATTACCTAT                 | 95 C – 5 min; 35 cycles (94 C – 30 sec, 58°C – 45 sec, 72°C – 45 sec); 72°C – 7 min      |
| <i>E4</i> | PhyA2             | F: AGACGTAGTGCTAGGGCTAT<br>R1: GCATCTCGCATCACCAGATCA<br>R2: GCTCATCCCTTCGAATTCAG | 94 C – 5 min; 30 cycles (94 C – 20 sec, 58°C – 20 sec, 72°C – 1 min); 72°C – 5 min       |
| <i>E7</i> | Satt 100          | F: ACCTCATTTTGGCATAAA<br>R: TTGGAAAACAAGTAATAATAACA                              | 95 C – 5 min; 35 cycles (92 C – 45 sec, 53°C – 1 min, 72°C – 1 min 20 sec); 72°C – 7 min |
|           | Satt 319          | F: CAACTCAGTAGGGGTCAATAACAA<br>R: TGAAATAGGGAAAATAAGGGAACA                       | 95 C – 5 min; 35 cycles (92 C – 25 sec, 53°C – 25 sec, 72°C – 35 sec); 72°C – 10 min     |

**Supplementary material S2. Results and efficiency of hybridization.**

| N  | Hybrid                 | Number of flowers used for hybridization | Number of hybrid pods | Number of hybrid seeds | Hybridization efficiency (%) | Number of F <sub>1</sub> hybrid plants with purple flower | Number of true hybrid plants |
|----|------------------------|------------------------------------------|-----------------------|------------------------|------------------------------|-----------------------------------------------------------|------------------------------|
| 1  | Birlik KB × Rana       | 30                                       | 7                     | 10                     | 23.3                         | 9                                                         | 3                            |
| 2  | Birlik KB × Toury      | 30                                       | 7                     | 10                     | 23.3                         | 9                                                         | 4                            |
| 3  | Birlik KB × Pripyat    | 30                                       | 5                     | 7                      | 16.7                         | 7                                                         | 1                            |
| 4  | Birlik KB × Grignon 5  | 30                                       | 7                     | 10                     | 23.3                         | 9                                                         | 4                            |
| 5  | Birlik KB × Pamyat YGK | 30                                       | 7                     | 9                      | 23.3                         | 9                                                         | 7                            |
| 6  | Birlik KB × Soer 345   | 30                                       | 5                     | 7                      | 16.7                         | 7                                                         | 2                            |
| 7  | Birlik KB × Altom      | 30                                       | 0                     | 0                      | 0.0                          | 0                                                         | 0                            |
| 8  | Zara ×Bara             | 30                                       | 4                     | 7                      | 13.3                         | 7                                                         | 3                            |
| 9  | Zara ×Maleta           | 30                                       | 4                     | 7                      | 13.3                         | 6                                                         | 5                            |
| 10 | Zara ×Soer 3           | 30                                       | 6                     | 6                      | 20.0                         | 5                                                         | 4                            |
| 11 | Zara ×Ustya            | 30                                       | 2                     | 3                      | 6.7                          | 3                                                         | 2                            |
| 12 | Zara ×Yaselda          | 30                                       | 2                     | 2                      | 6.7                          | 2                                                         | 1                            |
| 13 | Zara ×Maple Amber      | 30                                       | 0                     | 0                      | 0.0                          | 0                                                         | 0                            |
| 14 | Zara ×Fiskeby III      | 30                                       | 0                     | 0                      | 0.0                          | 0                                                         | 0                            |
| 15 | Zara ×Jhony            | 30                                       | 3                     | 5                      | 10.0                         | 4                                                         | 2                            |
|    | <b>Total</b>           | <b>450</b>                               | <b>59</b>             | <b>83</b>              | <b>13.1</b>                  | <b>77</b>                                                 | <b>38</b>                    |

**Supplementary material S3.** Growth and yield traits in plants from hybrid populations grown in southern Kazakhstan.

| N  | Type    | Name                   | Plant height (cm) | First pod height (cm) | Pod number per plant | 1000 seeds weigh (g) | Seed weight per plant (g) | Time to maturity (days) |
|----|---------|------------------------|-------------------|-----------------------|----------------------|----------------------|---------------------------|-------------------------|
| 1  | Isoline | Harosoy OT94-47        | 32,8±3,3          | 7,2±2,3               | 21,2±6,2             | 168,0±4,9            | 5,4±0,1                   | 96                      |
| 2  | Isoline | Harosoy OT89-5         | 55,4±3,5          | 8,0±0,6               | 31,2±6,8             | 180,8±2,6            | 7,5±1,7                   | 99                      |
| 3  | Isoline | cv. Harosoy            | 58,2±4,4          | 5,2±1,1               | 54,2±15,6            | 186,2±3,3            | 20,6±4,1                  | 118                     |
| 4  | ♀       | Birlik KV              | 39,1±6,4          | 2,8±1,4               | 36,3±13,1            | 170,0±21,5           | 11,8±4,6                  | 112                     |
| 5  | HP*     | Birlik KV x Rana       | 35,3±9,8          | 4,4±1,7               | 40,2±25,1            | 168,9±18             | 12,4±7,9                  | 107                     |
| 6  | ♂       | Rana                   | 28,0±3,9          | 7,8±4,7               | 14,0±4,0             | 152,7±20,9           | 5,8±0,6                   | 104                     |
| 7  | HP      | Бірлік KB x Pripyat    | 30,2±7,1          | 5,5±2,1               | 19,1±12,6            | 189,9±23,3           | 7,4±5,1                   | 108                     |
| 8  | ♂       | Pripyat                | 34,6±3,9          | 4,3±2,7               | 21,5±5,4             | 178,3±23,4           | 7,8±2,0                   | 116                     |
| 9  | HP      | Birlik KV x Gignon 5   | 29,6±10,5         | 5,0±2,3               | 20,9±19,0            | 183,6±44,3           | 8,5±8,2                   | 108                     |
| 10 | ♂       | Gignon 5               | 30,5±5,4          | 4,5±2,4               | 22,4±11,0            | 185,47,5             | 7,3±3,7                   | 128                     |
| 11 | HP      | Birlik KV x Pamyat YGK | 53,5±10,5         | 7,7±2,8               | 28,321,3             | 192,6±26,7           | 11,3±7,7                  | 126                     |
| 12 | ♂       | Pamyat YGK             | 55,6±8,1          | 7,6±3,0               | 44,5±22,3            | 186,3±15,2           | 19,8±10,2                 | 129                     |
| 13 | HP      | Birlik KV x Toury      | 33,9±10,1         | 6,2±2,5               | 21,4±16,9            | 180,5±32,8           | 7,4±5,9                   | 107                     |
| 14 | ♂       | Toury                  | 41,8±10,9         | 8,4±1,1               | 28,7±18,6            | 204,3±15,7           | 9,9±6,9                   | 110                     |
| 15 | HP      | Birlik KV x Soer 345   | 32,4±10,2         | 5,7±2,6               | 25,2±17,2            | 163,9±3,2            | 8,5±6,4                   | 113                     |
| 16 | ♂       | Soer 345               | 30,8±8,0          | 5,5±2,5               | 19,7±8,8             | 164,7±23,9           | 7,3±4,1                   | 116                     |
| 17 | ♀       | Zara                   | 63,6±8,6          | 5,3±1,6               | 48,2±13,7            | 167,0±23,4           | 16,5±5,4                  | 116                     |
| 18 | HP      | Zara x Bara            | 45,1±7,5          | 7,3±1,3               | 33,0±9,8             | 206,1±18,3           | 9,8±1,9                   | 112                     |
| 19 | ♂       | Bara×                  | 25,1±4,1          | 9,3±1,2               | 10,0±2,9             | 210,1±20,2           | 6,8±1,7                   | 110                     |
| 20 | HP      | Zara x Maleta          | 57,3±16,2         | 5,8±2,8               | 37,0±14,9            | 166,3±27,9           | 13,1±6,1                  | 116                     |
| 21 | ♂       | Maleta                 | 38,0±7,3          | 5,0±0,6               | 29,6±4,9             | 154,2±13,6           | 9,0±0,9                   | 85                      |
| 22 | HP      | Zara x Ustyа           | 52,1±10,9         | 4,7±2,3               | 48,9±20,6            | 158,5±23,9           | 17,2±7,9                  | 119                     |
| 23 | ♂       | Ustyа                  | 27,9±3,6          | 5,1±1,2               | 21,1±6,5             | 180,7±14,7           | 7,5±2,6                   | 110                     |
| 24 | HP      | Zara x Soer 3          | 47,9±7,7          | 6,7±3,7               | 40,8±18,3            | 158,6±21,1           | 13,8±6,6                  | 121                     |
| 25 | ♂       | Soer 3                 | 25,8±1,5          | 4,5±0,5               | 12,8±0,8             | 161,3±6,5            | 13,3±10,2                 | 94                      |
| 26 | HP      | Zara x Jhony           | 68,1±13,1         | 6,1±1,2               | 65,7±21,0            | 173,4±15,5           | 24,1±8,7                  | 114                     |
| 27 | ♂       | Jhony                  | 38,9±11,9         | 5,1±1,4               | 23,7±11,5            | 192,7±11,3           | 8,1±4,4                   | 110                     |

Note: HP\*, Hybrid population

**Supplementary material S4.** The list of the 103 identified soybean hybrid breeding lines, selected and studied for allelic polymorphism in *E* genes, flowering and maturation in northern Kazakhstan, Kostanay, 2022.

Note: Time to maturity over 121 days is indicated in Bold for genotypes that did not complete their maturation during growth period.

| N  | Hybrid                 | Breeding line ID | Alleles of <i>E</i> genes |           |           |           | Genotype           | Flowering time (days) | Time to maturity (days) |
|----|------------------------|------------------|---------------------------|-----------|-----------|-----------|--------------------|-----------------------|-------------------------|
|    |                        |                  | <i>E1</i>                 | <i>E3</i> | <i>E4</i> | <i>E7</i> |                    |                       |                         |
| 1  | Birlik KV × Toury      | P-6/3-2          | <i>e1</i>                 | <i>E3</i> | <i>E4</i> | <i>e7</i> | <i>e1 E3 E4 e7</i> | 33                    | 106                     |
| 2  | Birlik KV × Pripyat    | P-2/7-1          | <i>e1</i>                 | <i>E3</i> | <i>E4</i> | <i>e7</i> | <i>e1 E3 E4 e7</i> | 35                    | 114                     |
| 3  | Birlik KV × Pripyat    | P-2/5-4          | <i>e1</i>                 | <i>E3</i> | <i>e4</i> | <i>e7</i> | <i>e1 E3 e4 e7</i> | 36                    | 92                      |
| 4  | Birlik KV × Rana       | P-1/11-5         | <i>e1</i>                 | <i>e3</i> | <i>E4</i> | <i>e7</i> | <i>e1 e3 E4 e7</i> | 37                    | 94                      |
| 5  | Birlik KV × Rana       | P-1/2-3          | <i>e1</i>                 | <i>e3</i> | <i>E4</i> | <i>e7</i> | <i>e1 e3 E4 e7</i> | 37                    | 94                      |
| 6  | Birlik KV × Rana       | P-1/10-2         | <i>e1</i>                 | <i>e3</i> | <i>E4</i> | <i>e7</i> | <i>e1 e3 E4 e7</i> | 38                    | 94                      |
| 7  | Birlik KV × Rana       | P-1/2-2          | <i>e1</i>                 | <i>e3</i> | <i>E4</i> | <i>e7</i> | <i>e1 e3 E4 e7</i> | 38                    | 94                      |
| 8  | Birlik KV × Rana       | P-1/10-5         | <i>e1</i>                 | <i>e3</i> | <i>E4</i> | <i>e7</i> | <i>e1 e3 E4 e7</i> | 38                    | 95                      |
| 9  | Birlik KV × Rana       | P-1/8-4          | <i>e1</i>                 | <i>e3</i> | <i>E4</i> | <i>e7</i> | <i>e1 e3 E4 e7</i> | 38                    | 96                      |
| 10 | Birlik KV × Rana       | P-1/10-3         | <i>e1</i>                 | <i>e3</i> | <i>E4</i> | <i>e7</i> | <i>e1 e3 E4 e7</i> | 38                    | 96                      |
| 11 | Birlik KV × Rana       | P-1/7-3          | <i>e1</i>                 | <i>e3</i> | <i>E4</i> | <i>e7</i> | <i>e1 e3 E4 e7</i> | 38                    | <b>130</b>              |
| 12 | Zara × Jhony           | P-13/1-1         | <i>E1</i>                 | <i>E3</i> | <i>e4</i> | <i>E7</i> | <i>E1 E3 e4 E7</i> | 38                    | <b>134</b>              |
| 13 | Zara × Maleta          | P-19/1-2         | <i>E1</i>                 | <i>E3</i> | <i>E4</i> | <i>E7</i> | <i>E1 E3 E4 E7</i> | 38                    | 113                     |
| 14 | Birlik KV × Gignon 5   | P-3/3-1          | <i>e1</i>                 | <i>E3</i> | <i>E4</i> | <i>e7</i> | <i>e1 E3 E4 e7</i> | 39                    | 102                     |
| 15 | Birlik KV × Gignon 5   | P-3/1-2          | <i>e1</i>                 | <i>E3</i> | <i>E4</i> | <i>e7</i> | <i>e1 E3 E4 e7</i> | 39                    | 106                     |
| 16 | Birlik KV × Gignon 5   | P-3/2-1          | <i>E1</i>                 | <i>E3</i> | <i>E4</i> | <i>E7</i> | <i>E1 E3 E4 E7</i> | 39                    | 109                     |
| 17 | Birlik KV × Pamyat YGK | P-10/4-2         | <i>e1</i>                 | <i>E3</i> | <i>E4</i> | <i>e7</i> | <i>e1 E3 E4 e7</i> | 39                    | <b>131</b>              |
| 18 | Birlik KV × Rana       | P-1/4-1          | <i>e1</i>                 | <i>E3</i> | <i>E4</i> | <i>e7</i> | <i>e1 E3 E4 e7</i> | 39                    | 103                     |
| 19 | Birlik KV × Rana       | P-1/3-4          | <i>e1</i>                 | <i>E3</i> | <i>E4</i> | <i>e7</i> | <i>e1 E3 E4 e7</i> | 39                    | 103                     |
| 20 | Birlik KV × Rana       | P-1/2-1          | <i>e1</i>                 | <i>e3</i> | <i>E4</i> | <i>e7</i> | <i>e1 e3 E4 e7</i> | 39                    | <b>140</b>              |
| 21 | Birlik KV × Toury      | P-6/4-1          | <i>e1</i>                 | <i>E3</i> | <i>E4</i> | <i>e7</i> | <i>e1 E3 E4 e7</i> | 39                    | 94                      |
| 22 | Zara × Maleta          | O-47/31          | <i>e1</i>                 | <i>E3</i> | <i>E4</i> | <i>e7</i> | <i>e1 E3 E4 e7</i> | 39                    | 103                     |

|    |                      |           |           |           |           |           |                    |    |            |
|----|----------------------|-----------|-----------|-----------|-----------|-----------|--------------------|----|------------|
| 23 | Zara × Maleta        | P-19/6-5  | <i>e1</i> | <i>E3</i> | <i>e4</i> | <i>e7</i> | <i>e1 E3 e4 e7</i> | 39 | 116        |
| 24 | Birlik KV × Gignon 5 | P-3/2-4   | <i>e1</i> | <i>E3</i> | <i>E4</i> | <i>e7</i> | <i>e1 E3 E4 e7</i> | 40 | 102        |
| 25 | Birlik KV × Gignon 5 | P-3/7-4   | <i>e1</i> | <i>E3</i> | <i>E4</i> | <i>e7</i> | <i>e1 E3 E4 e7</i> | 40 | 116        |
| 26 | Birlik KV × Gignon 5 | P-3/4-6   | <i>e1</i> | <i>E3</i> | <i>E4</i> | <i>e7</i> | <i>e1 E3 E4 e7</i> | 40 | 117        |
| 27 | Birlik KV × Pripyat  | P-2/6-1   | <i>e1</i> | <i>E3</i> | <i>E4</i> | <i>e7</i> | <i>e1 E3 E4 e7</i> | 40 | 103        |
| 28 | Birlik KV × Pripyat  | P-2/10-5  | <i>e1</i> | <i>E3</i> | <i>E4</i> | <i>e7</i> | <i>e1 E3 E4 e7</i> | 40 | 117        |
| 29 | Birlik KV × Rana     | P-1/6-4   | <i>E1</i> | <i>e3</i> | <i>E4</i> | <i>E7</i> | <i>E1 e3 E4 E7</i> | 40 | 101        |
| 30 | Birlik KV × Rana     | P-1/8-1   | <i>e1</i> | <i>e3</i> | <i>E4</i> | <i>e7</i> | <i>e1 e3 E4 e7</i> | 40 | 111        |
| 31 | Birlik KV × Rana     | P-1/3-2   | <i>e1</i> | <i>E3</i> | <i>E4</i> | <i>e7</i> | <i>e1 E3 E4 e7</i> | 40 | 111        |
| 32 | Birlik KV × Soer 345 | P-9/3-6   | <i>E1</i> | <i>E3</i> | <i>E4</i> | <i>E7</i> | <i>E1 E3 E4 E7</i> | 40 | 93         |
| 33 | Birlik KV × Toury    | P-6/2-6   | <i>e1</i> | <i>E3</i> | <i>E4</i> | <i>e7</i> | <i>e1 E3 E4 e7</i> | 40 | 109        |
| 34 | Birlik KV × Toury    | P-6/8-6   | <i>e1</i> | <i>E3</i> | <i>E4</i> | <i>e7</i> | <i>e1 E3 E4 e7</i> | 40 | 110        |
| 35 | Birlik KV × Toury    | P-6/7-9   | <i>e1</i> | <i>E3</i> | <i>E4</i> | <i>e7</i> | <i>e1 E3 E4 e7</i> | 40 | <b>135</b> |
| 36 | Zara × Maleta        | O-47/32   | <i>e1</i> | <i>E3</i> | <i>e4</i> | <i>e7</i> | <i>e1 E3 e4 e7</i> | 40 | 104        |
| 37 | Zara × Maleta        | P-19/10-1 | <i>e1</i> | <i>E3</i> | <i>e4</i> | <i>e7</i> | <i>e1 E3 e4 e7</i> | 40 | <b>135</b> |
| 38 | Zara × Maleta        | O-47/41   | <i>e1</i> | <i>E3</i> | <i>e4</i> | <i>e7</i> | <i>e1 E3 e4 e7</i> | 40 | <b>130</b> |
| 39 | Zara × Ustya         | P-20/2-2  | <i>E1</i> | <i>E3</i> | <i>E4</i> | <i>E7</i> | <i>E1 E3 E4 E7</i> | 40 | <b>138</b> |
| 40 | Birlik KV × Pripyat  | P-2/8-5   | <i>e1</i> | <i>E3</i> | <i>e4</i> | <i>e7</i> | <i>e1 E3 e4 e7</i> | 41 | 114        |
| 41 | Birlik KV × Rana     | P-1/8-3   | <i>e1</i> | <i>e3</i> | <i>E4</i> | <i>e7</i> | <i>e1 e3 E4 e7</i> | 41 | 101        |
| 42 | Birlik KV × Rana     | P-1/3-1   | <i>e1</i> | <i>e3</i> | <i>E4</i> | <i>e7</i> | <i>e1 e3 E4 e7</i> | 41 | 102        |
| 43 | Birlik KV × Rana     | P-1/9-5   | <i>E1</i> | <i>e3</i> | <i>E4</i> | <i>E7</i> | <i>E1 e3 E4 E7</i> | 41 | 102        |
| 44 | Birlik KV × Rana     | P-1/8-2   | <i>e1</i> | <i>e3</i> | <i>E4</i> | <i>e7</i> | <i>e1 e3 E4 e7</i> | 41 | 103        |
| 45 | Birlik KV × Rana     | P-1/12-1  | <i>e1</i> | <i>e3</i> | <i>E4</i> | <i>e7</i> | <i>e1 e3 E4 e7</i> | 41 | 104        |
| 46 | Birlik KV × Rana     | P-1/7-1   | <i>E1</i> | <i>e3</i> | <i>E4</i> | <i>E7</i> | <i>E1 e3 E4 E7</i> | 41 | 104        |
| 47 | Birlik KV × Rana     | P-1/13-4  | <i>E1</i> | <i>E3</i> | <i>E4</i> | <i>E7</i> | <i>E1 E3 E4 E7</i> | 41 | 106        |
| 48 | Birlik KV × Rana     | P-1/8-1   | <i>e1</i> | <i>e3</i> | <i>E4</i> | <i>e7</i> | <i>e1 e3 E4 e7</i> | 41 | 111        |
| 49 | Birlik KV × Soer 345 | P-9/2-2   | <i>e1</i> | <i>E3</i> | <i>E4</i> | <i>e7</i> | <i>e1 E3 E4 e7</i> | 41 | <b>136</b> |
| 50 | Zara × Bara          | P-17/2-4  | <i>E1</i> | <i>E3</i> | <i>E4</i> | <i>E7</i> | <i>E1 E3 E4 E7</i> | 41 | <b>133</b> |

|    |                        |          |           |           |           |           |                    |    |            |
|----|------------------------|----------|-----------|-----------|-----------|-----------|--------------------|----|------------|
| 51 | Birlik KV × Rana       | P-1/11-1 | <i>e1</i> | <i>e3</i> | <i>E4</i> | <i>e7</i> | <i>e1 e3 E4 e7</i> | 42 | 102        |
| 52 | Birlik KV × Rana       | P-1/7-4  | <i>E1</i> | <i>E3</i> | <i>E4</i> | <i>E7</i> | <i>E1 E3 E4 E7</i> | 42 | 102        |
| 53 | Birlik KV × Rana       | P-1/3-3  | <i>e1</i> | <i>e3</i> | <i>E4</i> | <i>e7</i> | <i>e1 e3 E4 e7</i> | 42 | 102        |
| 54 | Birlik KV × Rana       | P-1/7-5  | <i>E1</i> | <i>e3</i> | <i>E4</i> | <i>E7</i> | <i>E1 e3 E4 E7</i> | 42 | 107        |
| 55 | Zara × Bara            | P-17/3-3 | <i>E1</i> | <i>E3</i> | <i>E4</i> | <i>E7</i> | <i>E1 E3 E4 E7</i> | 42 | <b>133</b> |
| 56 | Zara × Maleta          | O-47/12  | <i>e1</i> | <i>E3</i> | <i>e4</i> | <i>e7</i> | <i>e1 E3 e4 e7</i> | 42 | 109        |
| 57 | Zara × Maleta          | O-47/42  | <i>E1</i> | <i>e3</i> | <i>E4</i> | <i>E7</i> | <i>E1 e3 E4 E7</i> | 42 | <b>138</b> |
| 58 | Zara × Ustya           | P-20/5-5 | <i>E1</i> | <i>E3</i> | <i>E4</i> | <i>E7</i> | <i>E1 E3 E4 E7</i> | 42 | 121        |
| 59 | Birlik KV × Pripyat    | P-2/8-9  | <i>e1</i> | <i>E3</i> | <i>E4</i> | <i>e7</i> | <i>e1 E3 E4 e7</i> | 43 | 113        |
| 60 | Birlik KV × Pripyat    | P-2/4-8  | <i>e1</i> | <i>E3</i> | <i>e4</i> | <i>e7</i> | <i>e1 E3 e4 e7</i> | 43 | 114        |
| 61 | Birlik KV × Rana       | P-1/5-1  | <i>E1</i> | <i>e3</i> | <i>E4</i> | <i>E7</i> | <i>E1 e3 E4 E7</i> | 43 | 107        |
| 62 | Birlik KV × Rana       | P-1/5-2  | <i>E1</i> | <i>e3</i> | <i>E4</i> | <i>E7</i> | <i>E1 e3 E4 E7</i> | 43 | 110        |
| 63 | Birlik KV × Rana       | P-1/9-1  | <i>E1</i> | <i>e3</i> | <i>E4</i> | <i>E7</i> | <i>E1 e3 E4 E7</i> | 43 | 112        |
| 64 | Birlik KV × Rana       | P-1/1-4  | <i>E1</i> | <i>E3</i> | <i>E4</i> | <i>E7</i> | <i>E1 E3 E4 E7</i> | 43 | 113        |
| 65 | Birlik KV × Rana       | P-1/9-2  | <i>E1</i> | <i>e3</i> | <i>E4</i> | <i>E7</i> | <i>E1 e3 E4 E7</i> | 43 | 113        |
| 66 | Birlik KV × Soer 345   | P-9/4-8  | <i>E1</i> | <i>E3</i> | <i>E4</i> | <i>E7</i> | <i>E1 E3 E4 E7</i> | 43 | <b>130</b> |
| 67 | Zara × Bara            | P-17/2-3 | <i>E1</i> | <i>E3</i> | <i>E4</i> | <i>E7</i> | <i>E1 E3 E4 E7</i> | 43 | <b>130</b> |
| 68 | Zara × Maleta          | O-47/21  | <i>E1</i> | <i>E3</i> | <i>E4</i> | <i>E7</i> | <i>E1 E3 E4 E7</i> | 43 | 114        |
| 69 | Zara × Ustya           | P-20/2-3 | <i>E1</i> | <i>E3</i> | <i>E4</i> | <i>E7</i> | <i>E1 E3 E4 E7</i> | 43 | 121        |
| 70 | Birlik KV × Rana       | P-1/13-5 | <i>E1</i> | <i>e3</i> | <i>E4</i> | <i>E7</i> | <i>E1 e3 E4 E7</i> | 45 | <b>130</b> |
| 71 | Birlik KV × Toury      | P-6/7-7  | <i>e1</i> | <i>E3</i> | <i>E4</i> | <i>e7</i> | <i>e1 E3 E4 e7</i> | 45 | <b>138</b> |
| 72 | Birlik KV × Gignon 5   | P-3/2-8  | <i>e1</i> | <i>E3</i> | <i>E4</i> | <i>e7</i> | <i>e1 E3 E4 e7</i> | 46 | <b>130</b> |
| 73 | Birlik KV × Pamyat YGK | P-10/1-2 | <i>E1</i> | <i>E3</i> | <i>E4</i> | <i>E7</i> | <i>E1 E3 E4 E7</i> | 46 | <b>130</b> |
| 74 | Birlik KV × Rana       | P-1/1-3  | <i>E1</i> | <i>E3</i> | <i>E4</i> | <i>E7</i> | <i>E1 E3 E4 E7</i> | 46 | 113        |
| 75 | Birlik KV × Rana       | P-1/1-1  | <i>E1</i> | <i>E3</i> | <i>E4</i> | <i>E7</i> | <i>E1 E3 E4 E7</i> | 46 | 114        |
| 76 | Birlik KV × Toury      | P-6/4-3  | <i>e1</i> | <i>E3</i> | <i>E4</i> | <i>e7</i> | <i>e1 E3 E4 e7</i> | 46 | <b>138</b> |
| 77 | Birlik KV × Rana       | P-1/5-3  | <i>E1</i> | <i>e3</i> | <i>E4</i> | <i>E7</i> | <i>E1 e3 E4 E7</i> | 47 | <b>132</b> |
| 78 | Birlik KV × Soer 345   | P-9/6-3  | <i>E1</i> | <i>E3</i> | <i>E4</i> | <i>E7</i> | <i>E1 E3 E4 E7</i> | 47 | <b>130</b> |

|     |                        |           |           |           |           |           |                    |    |            |
|-----|------------------------|-----------|-----------|-----------|-----------|-----------|--------------------|----|------------|
| 79  | Birlik KV × Pamyat YGK | P-10/4-1  | <i>e1</i> | <i>E3</i> | <i>E4</i> | <i>e7</i> | <i>e1 E3 E4 e7</i> | 48 | 116        |
| 80  | Zara × Maleta          | P-19/10-3 | <i>e1</i> | <i>E3</i> | <i>e4</i> | <i>e7</i> | <i>e1 E3 e4 e7</i> | 49 | 116        |
| 81  | Zara × Maleta          | P-19/3-4  | <i>E1</i> | <i>E3</i> | <i>E4</i> | <i>E7</i> | <i>E1 E3 E4 E7</i> | 49 | <b>135</b> |
| 82  | Zara × Soer 3          | P-18/8-9  | <i>E1</i> | <i>E3</i> | <i>E4</i> | <i>E7</i> | <i>E1 E3 E4 E7</i> | 49 | <b>136</b> |
| 83  | Zara × Ustya           | P-20/2-1  | <i>E1</i> | <i>E3</i> | <i>E4</i> | <i>E7</i> | <i>E1 E3 E4 E7</i> | 49 | <b>140</b> |
| 84  | Birlik KV × Pamyat YGK | P-10/2-9  | <i>e1</i> | <i>E3</i> | <i>E4</i> | <i>e7</i> | <i>e1 E3 E4 e7</i> | 50 | <b>132</b> |
| 85  | Birlik KV × Pripyat    | P-2/8-6   | <i>e1</i> | <i>E3</i> | <i>E4</i> | <i>e7</i> | <i>e1 E3 E4 e7</i> | 50 | <b>134</b> |
| 86  | Zara × Maleta          | P-19/10-8 | <i>E1</i> | <i>E3</i> | <i>e4</i> | <i>E7</i> | <i>E1 E3 e4 E7</i> | 50 | 106        |
| 87  | Zara × Ustya           | P-20/1-1  | <i>e1</i> | <i>E3</i> | <i>E4</i> | <i>e7</i> | <i>e1 E3 E4 e7</i> | 50 | 118        |
| 88  | Zara × Jhony           | P-13/1-6  | <i>E1</i> | <i>E3</i> | <i>e4</i> | <i>E7</i> | <i>E1 E3 e4 E7</i> | 51 | <b>134</b> |
| 89  | Zara × Maleta          | P-19/5-8  | <i>e1</i> | <i>E3</i> | <i>e4</i> | <i>e7</i> | <i>e1 E3 e4 e7</i> | 51 | 118        |
| 90  | Zara × Maleta          | P-19/1-3  | <i>E1</i> | <i>E3</i> | <i>E4</i> | <i>E7</i> | <i>E1 E3 E4 E7</i> | 51 | <b>134</b> |
| 91  | Zara × Maleta          | P-19/10-5 | <i>E1</i> | <i>E3</i> | <i>E4</i> | <i>E7</i> | <i>E1 E3 E4 E7</i> | 51 | <b>135</b> |
| 92  | Zara × Bara            | P-17/3-4  | <i>E1</i> | <i>E3</i> | <i>E4</i> | <i>E7</i> | <i>E1 E3 E4 E7</i> | 52 | <b>136</b> |
| 93  | Zara × Maleta          | P-19/10-2 | <i>e1</i> | <i>E3</i> | <i>e4</i> | <i>e7</i> | <i>e1 E3 e4 e7</i> | 52 | 100        |
| 94  | Zara × Soer 3          | P-18/3-2  | <i>E1</i> | <i>E3</i> | <i>E4</i> | <i>E7</i> | <i>E1 E3 E4 E7</i> | 52 | <b>136</b> |
| 95  | Birlik KV × Gignon 5   | P-3/1-5   | <i>E1</i> | <i>E3</i> | <i>E4</i> | <i>E7</i> | <i>E1 E3 E4 E7</i> | 53 | <b>130</b> |
| 96  | Zara × Maleta          | P-19/1-8  | <i>E1</i> | <i>E3</i> | <i>E4</i> | <i>E7</i> | <i>E1 E3 E4 E7</i> | 53 | <b>136</b> |
| 97  | Zara × Ustya           | P-20/5-1  | <i>E1</i> | <i>E3</i> | <i>E4</i> | <i>E7</i> | <i>E1 E3 E4 E7</i> | 53 | <b>140</b> |
| 98  | Zara × Ustya           | P-20/2-6  | <i>E1</i> | <i>E3</i> | <i>e4</i> | <i>E7</i> | <i>E1 E3 e4 E7</i> | 53 | <b>136</b> |
| 99  | Zara × Soer 3          | P-18/8-1  | <i>E1</i> | <i>E3</i> | <i>E4</i> | <i>E7</i> | <i>E1 E3 E4 E7</i> | 54 | <b>137</b> |
| 100 | Birlik KV × Toury      | P-6/4-5   | <i>e1</i> | <i>E3</i> | <i>E4</i> | <i>e7</i> | <i>e1 E3 E4 e7</i> | 55 | <b>140</b> |
| 101 | Zara × Jhony           | P-13/1-5  | <i>E1</i> | <i>E3</i> | <i>e4</i> | <i>E7</i> | <i>E1 E3 e4 E7</i> | 55 | <b>139</b> |
| 102 | Zara × Maleta          | O-47/11   | <i>e1</i> | <i>E3</i> | <i>e4</i> | <i>e7</i> | <i>e1 E3 e4 e7</i> | 57 | 108        |
| 103 | Zara × Soer 3          | P-18/5-6  | <i>E1</i> | <i>E3</i> | <i>E4</i> | <i>E7</i> | <i>E1 E3 E4 E7</i> | 58 | <b>137</b> |

**Supplementary material S5.** Growth and yield traits in plants of 20 selected breeding lines grown in field trials in northern Kazakhstan, Kostanay, 2022.

| N  | Hybrid               | Breeding line ID | Genotype           | Seed weight per plant (g) | 1000 seed weight (g) | Time to maturity (days) |
|----|----------------------|------------------|--------------------|---------------------------|----------------------|-------------------------|
| 1  | Birlik KV × Rana     | P-1/11-5         | <i>e1 e3 E4 e7</i> | 12,3±1,6                  | 135±4,6              | 94                      |
| 2  | Birlik KV × Rana     | P-1/2-3          | <i>e1 e3 E4 e7</i> | 12,5±1,3                  | 142±5,9              | 94                      |
| 3  | Birlik KV × Rana     | P-1/10-2         | <i>e1 e3 E4 e7</i> | 12,1±1,5                  | 138±2,8              | 94                      |
| 4  | Birlik KV × Rana     | P-1/2-2          | <i>e1 e3 E4 e7</i> | 13,2±2,1                  | 130±1,7              | 94                      |
| 5  | Birlik KV × Rana     | P-1/10-5         | <i>e1 e3 E4 e7</i> | 16,1±1,6                  | 136±3,1              | 95                      |
| 6  | Birlik KV × Rana     | P-1/8-4          | <i>e1 e3 E4 e7</i> | 13,2±1,2                  | 124±2,5              | 96                      |
| 7  | Birlik KV × Rana     | P-1/10-3         | <i>e1 e3 E4 e7</i> | 13,5±1,5                  | 129±1,9              | 96                      |
| 8  | Birlik KV × Rana     | P-1/6-4          | <i>E1 e3 E4 E7</i> | 17,1±1,5                  | 148±2,3              | 101                     |
| 9  | Birlik KV × Rana     | P-1/8-3          | <i>e1 e3 E4 e7</i> | 15,2±1,6                  | 145±2,7              | 101                     |
| 10 | Birlik KV × Rana     | P-1/3-1          | <i>e1 e3 E4 e7</i> | 14,2±1,8                  | 146±3,9              | 102                     |
| 11 | Birlik KV × Rana     | P-1/9-5          | <i>E1 e3 E4 E7</i> | 17,8±2,4                  | 138±2,5              | 102                     |
| 12 | Birlik KV × Rana     | P-1/11-1         | <i>e1 e3 E4 e7</i> | 15,6±1,6                  | 126±2,9              | 102                     |
| 13 | Birlik KV × Rana     | P-1/7-4          | <i>E1 E3 E4 E7</i> | 17,9±2,3                  | 129±3,6              | 102                     |
| 14 | Birlik KV × Rana     | P-1/3-3          | <i>e1 e3 E4 e7</i> | 15,6±1,4                  | 138±3,4              | 102                     |
| 15 | Birlik KV × Pripyat  | P-2/5-4          | <i>e1 E3 e4 e7</i> | 18,2±2,2                  | 156±5,2              | 92                      |
| 16 | Zara × Maleta        | P-19/10-2        | <i>e1 E3 e4 e7</i> | 15,3±1,3                  | 139±2,8              | 100                     |
| 17 | Birlik KV × Toury    | P-6/4-1          | <i>e1 E3 E4 e7</i> | 15,6±2,4                  | 129±2,5              | 94                      |
| 18 | Birlik KV × Soer 345 | P-9/3-6          | <i>E1 E3 E4 E7</i> | 18,6±1,3                  | 145±7,5              | 93                      |
| 19 | Birlik KV × Gignon 5 | P-3/3-1          | <i>e1 E3 E4 e7</i> | 16,8±1,9                  | 149±2,6              | 102                     |
| 20 | Birlik KV × Gignon 5 | P-3/2-4          | <i>e1 E3 E4 e7</i> | 15,9±2,5                  | 147±4,3              | 102                     |
